# Supplementary material
Source: Springer Nature journal article supplement (https://www.springermedizin.de/resource/supplementary/12891_2009_793_MOESM3_ESM.pdf/9507028)

# SF-36 physical function before and after THR

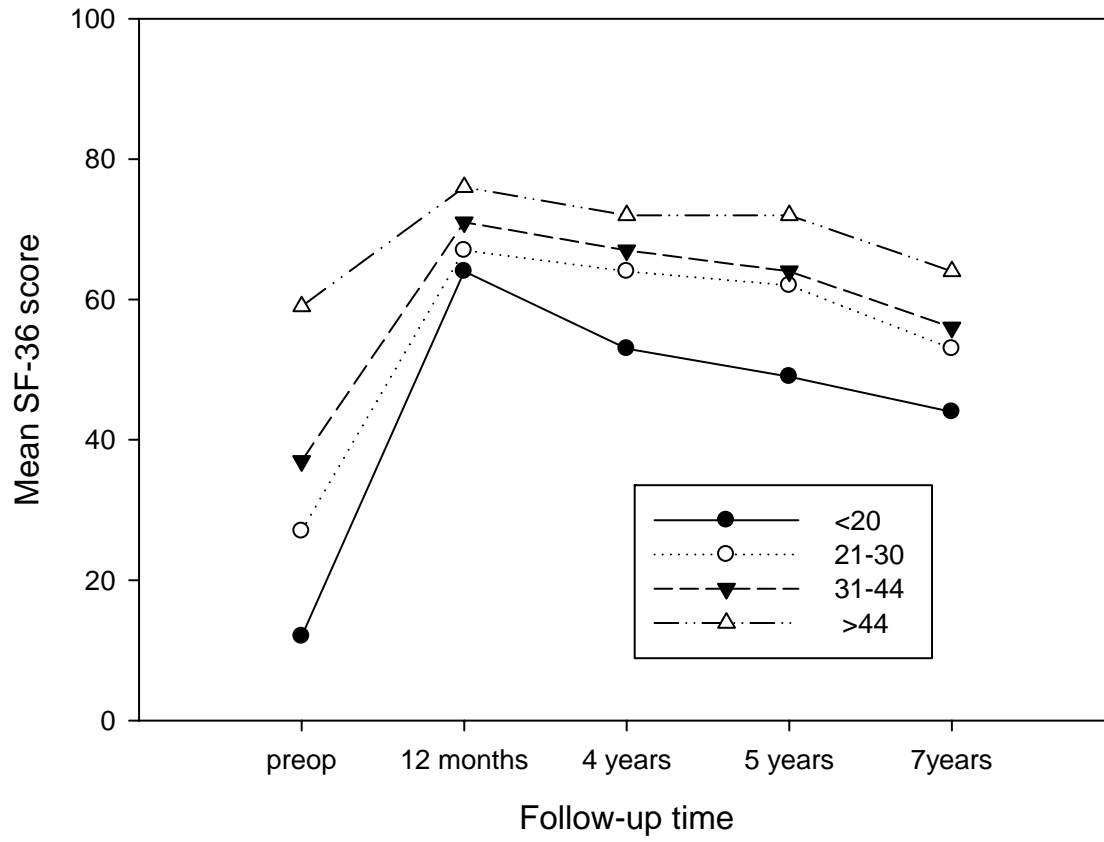

Supplement: MOESM3 [file 9507028]
